# Supplementary material for: Exposure to Tobacco Smoke in Utero and Subsequent Plasma Lipids, ApoB, and CRP among Adult Women in the MoBa Cohort
Source: PubMed Central journal article supplement (PMC3556606; doi:10.1289/ehp.1104563), 2012-07-19
Supplement: ehp.1104563.s001.pdf [file ehp.1104563.s001.pdf]

## Supplemental Material

### Exposure to Tobacco Smoke *in Utero* and Subsequent Plasma Lipids, ApoB and CRP Among Adult Women in the MoBa Cohort

Lea A. Cupul-Uicab<sup>1\*</sup>, Rolv Skjaerven<sup>2,3</sup>, Kjell Haug<sup>2</sup>, Gregory S. Travlos<sup>4</sup>, Ralph E. Wilson<sup>4</sup>,  
Merete Eggesbø<sup>5</sup>, Jane A. Hoppin<sup>1</sup>, Kristina W. Whitworth<sup>1</sup>, Matthew P. Longnecker<sup>1</sup>

<sup>1</sup>Epidemiology Branch, National Institute of Environmental Health Sciences, NIH/DHHS/USA,  
Research Triangle Park, NC, USA

<sup>2</sup>Department of Public Health and Primary Health Care, University of Bergen, Bergen, Norway

<sup>3</sup>Medical Birth Registry of Norway, the Norwegian Institute of Public Health, Bergen, Norway

<sup>4</sup>Cellular and Molecular Pathology Branch, National Institute of Environmental Health Sciences,  
NIH/DHHS/USA, Research Triangle Park, NC, USA

<sup>5</sup>Department of Genes and Environment, Division of Epidemiology, Norwegian Institute of  
Public Health, Oslo, Norway

\*Corresponding author:

Lea A. Cupul-Uicab, ScD.

National Institute of Environmental Health Sciences, MD A3-05, 111 TW Alexander Dr,  
Research Triangle Park, North Carolina 27709, USA; e-mail: [cupuluicabl@niehs.nih.gov](mailto:cupuluicabl@niehs.nih.gov),  
[acuicab@hotmail.com](mailto:acuicab@hotmail.com); tel. 919 541-3630; fax 919 541-2511

Supplemental Material, Table S1. Characteristics of women from the MoBa cohort according to their selection status

| Characteristics                       | Selection status              |                                                | <i>p</i> <sup>b</sup> |
|---------------------------------------|-------------------------------|------------------------------------------------|-----------------------|
|                                       | Base sample<br>(n = 479)<br>% | Subfecund women <sup>a</sup><br>(n = 344)<br>% |                       |
| Age (years)                           |                               |                                                | < 0.01                |
| < 25                                  | 9.0                           | 7.6                                            |                       |
| 25 - 29                               | 38.2                          | 26.7                                           |                       |
| 30 - 34                               | 37.4                          | 46.5                                           |                       |
| ≥ 35                                  | 15.4                          | 19.2                                           |                       |
| Education                             |                               |                                                | < 0.01                |
| < High School                         | 6.7                           | 12.5                                           |                       |
| High School                           | 29.4                          | 34.9                                           |                       |
| College                               | 44.7                          | 38.1                                           |                       |
| > College                             | 19.2                          | 14.5                                           |                       |
| Individual annual income (USD)        |                               |                                                | 0.37                  |
| < 30,847                              | 24.8                          | 29.7                                           |                       |
| 30,847 - 46,269                       | 41.8                          | 36.6                                           |                       |
| 46,270 - 61,693                       | 24.0                          | 24.7                                           |                       |
| > 61,693                              | 9.4                           | 9.0                                            |                       |
| Parity                                |                               |                                                | < 0.01                |
| 0                                     | 43.2                          | 57.6                                           |                       |
| 1                                     | 38.8                          | 29.9                                           |                       |
| ≥ 2                                   | 18.0                          | 12.5                                           |                       |
| BMI (kg/m <sup>2</sup> ) <sup>c</sup> |                               |                                                | 0.01                  |
| < 25.0                                | 52.8                          | 47.4                                           |                       |
| 25.0 - < 30.0                         | 33.6                          | 31.1                                           |                       |
| 30.0 +                                | 13.6                          | 21.5                                           |                       |

Supplemental Material, Table S1 (cont.)

| Characteristics                             | Selection status              |                                                | <i>p</i> <sup>b</sup> |
|---------------------------------------------|-------------------------------|------------------------------------------------|-----------------------|
|                                             | Base sample<br>(n = 479)<br>% | Subfecund women <sup>a</sup><br>(n = 344)<br>% |                       |
| Smoking (cigarettes/day) <sup>c</sup>       |                               |                                                | 0.01                  |
| Non smoker                                  | 78.9                          | 72.7                                           |                       |
| < 10                                        | 18.2                          | 20.1                                           |                       |
| 10 +                                        | 2.9                           | 7.3                                            |                       |
| Alcohol drinking <sup>c</sup>               |                               |                                                | 0.16                  |
| Non drinker                                 | 75.6                          | 81.1                                           |                       |
| Yes                                         | 15.2                          | 11.3                                           |                       |
| Missing                                     | 9.2                           | 7.6                                            |                       |
| Physical activity (times/week) <sup>c</sup> |                               |                                                | 0.73                  |
| None                                        | 20.7                          | 22.7                                           |                       |
| < 4.0                                       | 54.5                          | 54.4                                           |                       |
| 4.0 - < 7.5                                 | 18.6                          | 18.3                                           |                       |
| ≥ 7.5                                       | 6.3                           | 4.7                                            |                       |
| Exposed to tobacco smoke <i>in utero</i>    | 28.0                          | 30.8                                           | 0.38                  |
| Triglycerides ≥ 200 mg/dL                   | 7.9                           | 9.9                                            | 0.33                  |
| HDL-C < 50 mg/dL                            | 6.9                           | 8.1                                            | 0.50                  |
| Total Cholesterol ≥ 240 mg/dL               | 20.3                          | 18.0                                           | 0.43                  |
| CRP ≥ 8 mg/L                                | 22.1                          | 26.5                                           | 0.15                  |

<sup>a</sup> Women with a time-to-pregnancy > 12 months

<sup>b</sup> *p*-values are from Pearson's chi-squared test comparing the base sample and subfecund women

<sup>c</sup> Reflects the woman's status at blood draw

Supplemental Material, Table S2. Distribution of plasma lipids, apolipoprotein B, and CRP among women from the base sample (n=479)

| Plasma levels<br>(mg/dL) | Mean $\pm$ SD    | Selected percentiles |       |       |       |
|--------------------------|------------------|----------------------|-------|-------|-------|
|                          |                  | 25th                 | 50th  | 75th  | 95th  |
| Triglycerides            | 128.8 $\pm$ 44.1 | 96.0                 | 121.0 | 152.0 | 213.0 |
| HDL-C                    | 67.5 $\pm$ 12.0  | 59.0                 | 68.0  | 75.0  | 88.0  |
| LDL-C                    | 127.6 $\pm$ 30.3 | 107.0                | 125.0 | 147.0 | 180.0 |
| Total Cholesterol        | 213.4 $\pm$ 35.1 | 189.0                | 211.0 | 234.0 | 280.0 |
| ApoB                     | 100.7 $\pm$ 22.6 | 85.0                 | 99.0  | 114.0 | 143.0 |
| CRP (mg/L)               | 6.4 $\pm$ 8.2    | 2.6                  | 4.0   | 7.4   | 17.7  |

Supplemental Material, Table S3. Estimated associations of *in utero* exposure to tobacco smoke with lipids, apolipoprotein B, and CRP among subfecund<sup>a</sup> women (n=344)

| Outcomes <sup>b</sup> | Adjusted   |               |                                                  |               |                          |               |          |               |                                  |               |
|-----------------------|------------|---------------|--------------------------------------------------|---------------|--------------------------|---------------|----------|---------------|----------------------------------|---------------|
|                       | Unadjusted |               | Age, education, and<br>physical activity<br>only |               | Plus personal<br>smoking |               | Plus BMI |               | Plus personal<br>smoking and BMI |               |
|                       | $\beta$    | 95% CI        | $\beta$                                          | 95% CI        | $\beta$                  | 95% CI        | $\beta$  | 95% CI        | $\beta$                          | 95% CI        |
| Triglycerides         | 2.3        | (-5.1, 10.3)  | 1.0                                              | (-6.4, 9.0)   | 0.3                      | (-7.1, 8.3)   | -1.6     | (-8.7, 5.9)   | -2.3                             | (-9.3, 5.3)   |
| HDL-C                 | -1.0       | (-3.8, 1.8)   | -0.5                                             | (-3.3, 2.3)   | -0.5                     | (-3.3, 2.4)   | 0.3      | (-2.5, 3.1)   | 0.3                              | (-2.5, 3.1)   |
| LDL-C                 | 1.9        | (-5.0, 8.7)   | 2.6                                              | (-4.4, 9.5)   | 2.7                      | (-4.3, 9.7)   | 1.6      | (-5.4, 8.6)   | 1.7                              | (-5.3, 8.7)   |
| Total cholesterol     | 0.5        | (-7.4, 8.4)   | 1.6                                              | (-6.4, 9.6)   | 1.5                      | (-6.5, 9.6)   | 1.5      | (-6.6, 9.5)   | 1.4                              | (-6.7, 9.6)   |
| ApoB                  | 1.4        | (-3.8, 6.6)   | 1.7                                              | (-3.6, 6.9)   | 1.5                      | (-3.8, 6.9)   | 0.6      | (-4.7, 5.9)   | 0.5                              | (-4.8, 5.8)   |
| CRP                   | 4.7        | (-13.4, 26.6) | 1.9                                              | (-15.9, 23.5) | 2.4                      | (-15.6, 24.4) | -7.8     | (-22.7, 10.0) | -7.1                             | (-22.2, 11.0) |

<sup>a</sup> Women with a time-to-pregnancy > 12 months

<sup>b</sup> Associations are expressed as the % difference in the geometric mean for log<sub>n</sub>-transformed outcomes (mg/dL triglycerides and mg/L CRP) or the difference in mean values (mg/dL of HDL-C, LDL-C, total cholesterol, and apoB) in the exposed compared with the unexposed group.

Supplemental Material, Figure S1. Directed acyclic graph for the selection of confounders when assessing the association of *in utero* exposure to tobacco smoke with plasma lipids, apolipoprotein B, and CRP among adult women from the MoBa cohort

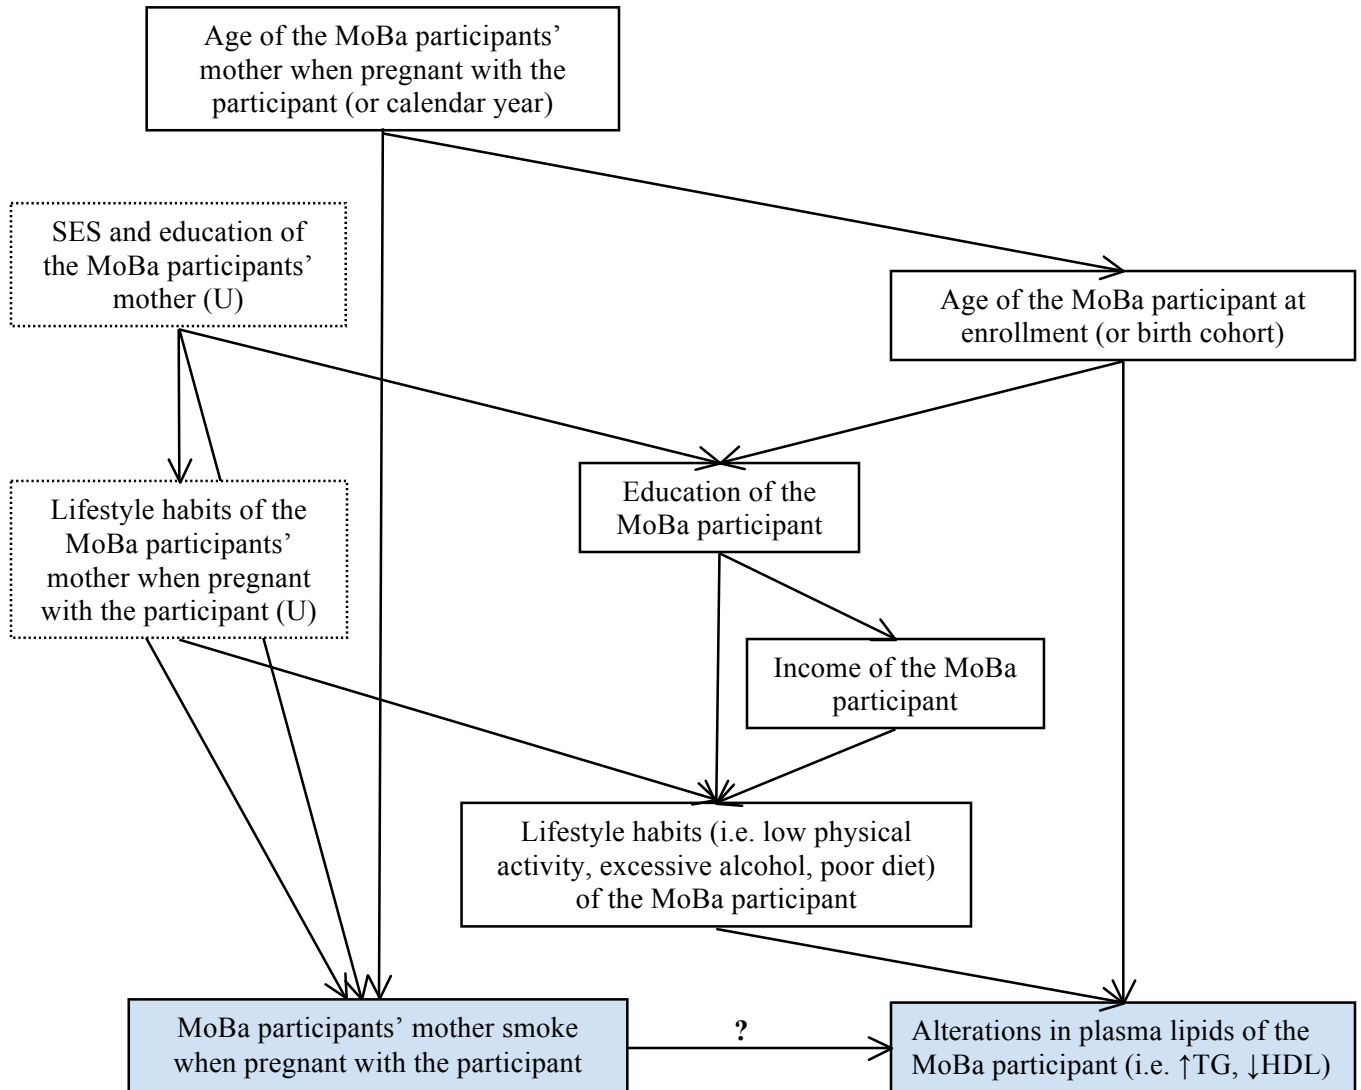

Variables connected by an arrow with a question mark, represents the association of interest. Variables from the mother (in dotted rectangles) were potential confounders that were unmeasured (U). This DAG represents an oversimplification of the potential association of *in utero* exposure to tobacco smoke with the outcomes.
